# Supplementary material for: Association of Neighborhood Resources and Race and Ethnicity With Readmissions for Diabetic Ketoacidosis at US Children’s Hospitals
Source: PubMed Central journal article supplement (PMC9073568; doi:10.1001/jamanetworkopen.2022.10456), 2022-05-05

## Supplementary Online Content

Bergmann KR, Nickel A, Hall M, et al. Association of neighborhood resources and race and ethnicity with readmissions for diabetic ketoacidosis at US children's hospitals. *JAMA Netw Open*. 2022;5(5):e2210456. doi:10.1001/jamanetworkopen.2022.10456

**eTable.** Estimated Probability of Readmission for Each COI Domain by Race and Ethnicity

**eFigure.** Projective Margins for DKA Readmission at 365 Days by Overall Neighborhood Child Opportunity, Adjusted for Race and Ethnicity

This supplementary material has been provided by the authors to give readers additional information about their work.

| <b>eTable. Estimated Probability of Readmission for Each COI Domain by Race and Ethnicity</b> |                    |           |                    |           |                    |           |                    |           |                    |           |
|-----------------------------------------------------------------------------------------------|--------------------|-----------|--------------------|-----------|--------------------|-----------|--------------------|-----------|--------------------|-----------|
|                                                                                               | <b>Very Low</b>    |           | <b>Low</b>         |           | <b>Moderate</b>    |           | <b>High</b>        |           | <b>Very High</b>   |           |
| <b>COI Domain</b>                                                                             | <b>Readmit (%)</b> | <b>SE</b> | <b>Readmit (%)</b> | <b>SE</b> | <b>Readmit (%)</b> | <b>SE</b> | <b>Readmit (%)</b> | <b>SE</b> | <b>Readmit (%)</b> | <b>SE</b> |
| <b>Social &amp; Economic</b>                                                                  |                    |           |                    |           |                    |           |                    |           |                    |           |
| Overall                                                                                       | 17.6               | 0.7       | 16.9               | 0.6       | 16.3               | 0.6       | 16.8               | 0.7       | 16.5               | 0.8       |
| NH-black                                                                                      | 22.1               | 1.1       | 22.1               | 1.1       | 20.8               | 1.1       | 22.2               | 1.4       | 24.7               | 1.9       |
| NH-white                                                                                      | 15.9               | 0.8       | 14.6               | 0.7       | 14.6               | 0.7       | 14.6               | 0.7       | 13.4               | 0.8       |
| Hispanic                                                                                      | 15.4               | 1.1       | 16.2               | 1.0       | 16.1               | 1.0       | 17.6               | 1.3       | 15.1               | 1.7       |
| Asian                                                                                         | 7.5                | 3.0       | 11.9               | 3.5       | 15.3               | 5.0       | 8.7                | 4.6       | 9.0                | 5.5       |
| Other                                                                                         | 17.8               | 1.6       | 15.4               | 1.3       | 11.0               | 1.3       | 10.5               | 1.2       | 10.8               | 1.5       |
| <b>Health &amp; Environment</b>                                                               |                    |           |                    |           |                    |           |                    |           |                    |           |
| Overall                                                                                       | 17.4               | 0.7       | 16.8               | 0.6       | 16.7               | 0.6       | 15.9               | 0.7       | 15.0               | 0.8       |
| NH-black                                                                                      | 24.0               | 1.1       | 23.2               | 1.0       | 20.7               | 1.1       | 20.8               | 1.3       | 21.4               | 1.8       |
| NH-white                                                                                      | 15.7               | 0.8       | 14.7               | 0.7       | 15.3               | 0.7       | 14.0               | 0.7       | 12.6               | 0.7       |
| Hispanic                                                                                      | 16.1               | 1.0       | 15.9               | 1.0       | 16.9               | 1.1       | 15.8               | 1.2       | 15.2               | 1.5       |
| Asian                                                                                         | 8.9                | 2.9       | 12.1               | 4.0       | 12.6               | 3.5       | 8.3                | 3.6       | 7.7                | 3.7       |
| Other                                                                                         | 11.9               | 1.1       | 13.7               | 1.1       | 15.1               | 1.3       | 15.5               | 1.3       | 12.3               | 1.5       |
| <b>Education</b>                                                                              |                    |           |                    |           |                    |           |                    |           |                    |           |
| Overall                                                                                       | 18.2               | 0.7       | 16.8               | 0.6       | 16.3               | 0.6       | 15.7               | 0.7       | 15.0               | 0.8       |
| NH-black                                                                                      | 24.4               | 1.2       | 23.1               | 1.1       | 20.9               | 1.1       | 21.3               | 1.2       | 20.7               | 1.7       |
| NH-white                                                                                      | 16.3               | 0.8       | 14.7               | 0.7       | 14.7               | 0.7       | 13.9               | 0.7       | 13.2               | 0.8       |
| Hispanic                                                                                      | 18.1               | 1.2       | 15.8               | 1.0       | 16.7               | 1.0       | 13.9               | 1.1       | 14.4               | 1.5       |
| Asian                                                                                         | 18.7               | 7.0       | 16.8               | 4.6       | 2.2                | 1.6       | 4.2                | 2.3       | 6.1                | 2.9       |
| Other                                                                                         | 13.1               | 1.2       | 13.4               | 1.2       | 14.5               | 1.3       | 14.8               | 1.5       | 11.4               | 1.6       |

COI – Child Opportunity Index; NH – Non-Hispanic; SE – Standard Error.

**eFigure. Projective Margins for DKA Readmission at 365 Days by Overall Neighborhood Child Opportunity, Adjusted for Race and Ethnicity**

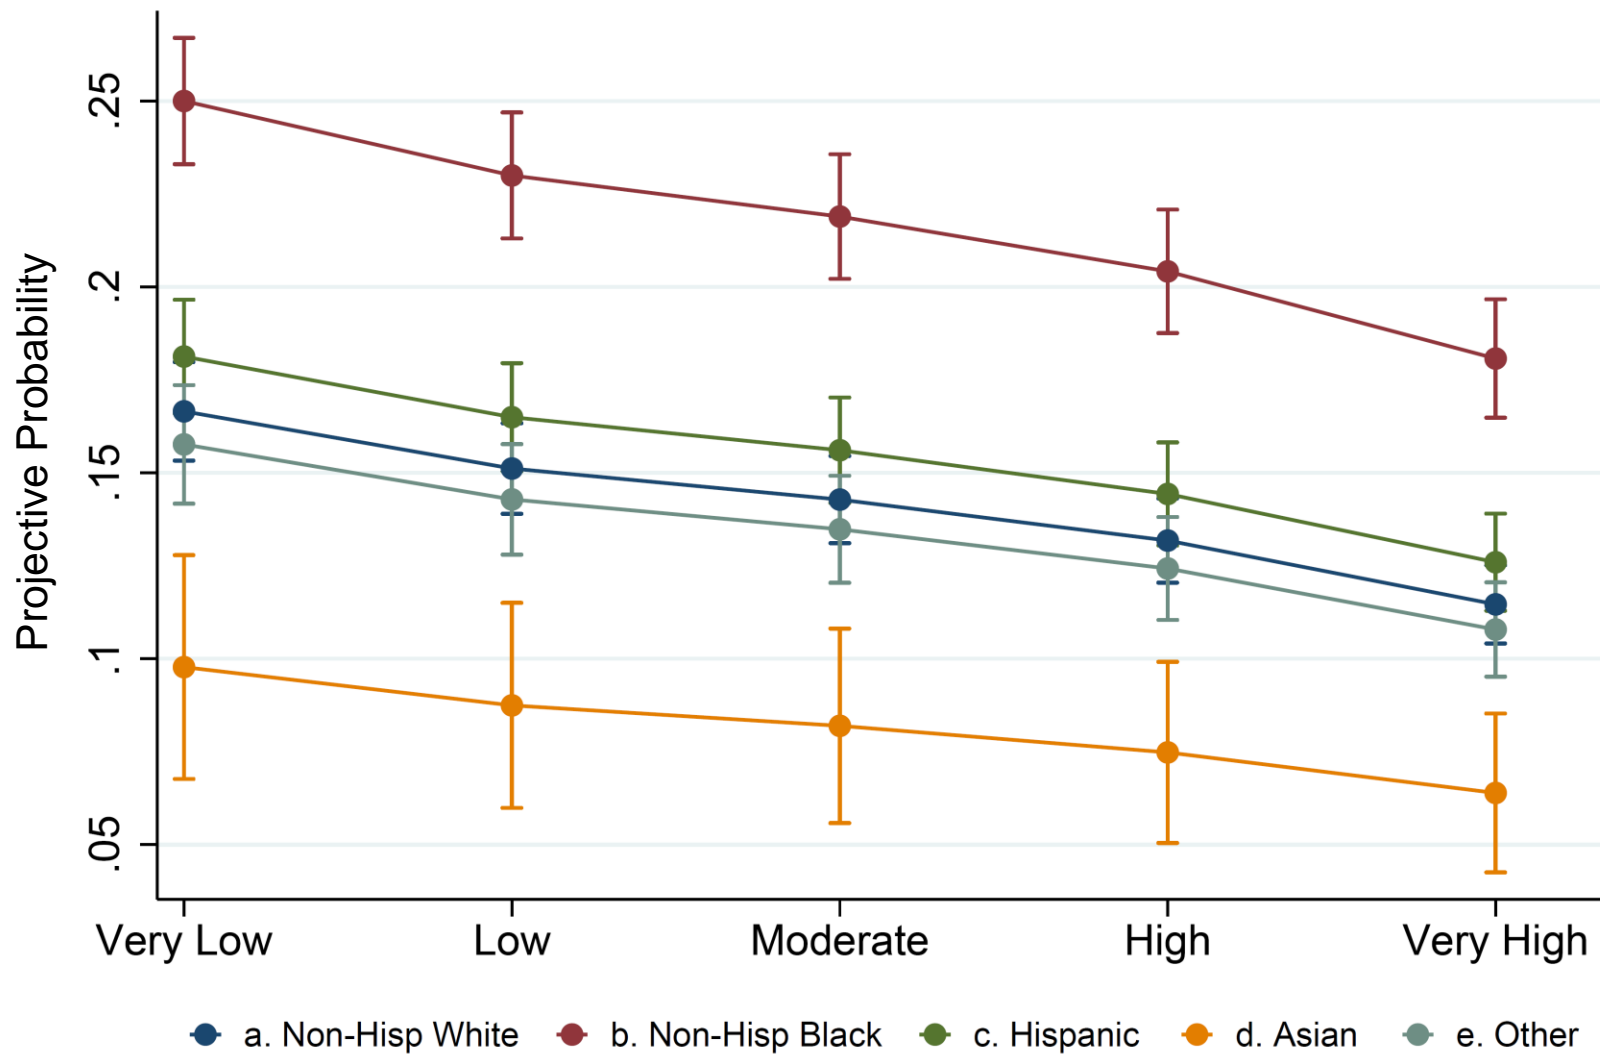

Supplement: jamanetwopen-e2210456-s001.pdf [file jamanetwopen-e2210456-s001.pdf]
